# Supplementary material for: Ultra-fast and universal detection of Gram-negative bacteria in complex samples based on colistin derivatives
Source: Royal Society of Chemistry journal article supplement (doi:10.1039/c9bm01926j), 2020-01-01
Supplement: c9bm01926j1.pdf [file c9bm01926j1.pdf]

## Supporting Information

### **Ultra-fast and universal detection of Gram-negative bacteria in complex samples based on colistin derivatives**

Jea Sung Ryu<sup>1</sup>, San Hae Im<sup>2</sup>, Yoo Kyung Kang<sup>2</sup>, Yang Soo Kim<sup>3</sup>, Hyun Jung Chung<sup>1,2\*</sup>

*<sup>1</sup>Graduate School of Nanoscience and Technology, Korea Advanced Institute of Science and Technology, Daejeon, Republic of Korea*

*<sup>2</sup>Department of Biological Sciences, Korea Advanced Institute of Science and Technology, Daejeon, Republic of Korea*

*<sup>3</sup>Division of Infectious Diseases, Asan Medical Center, University of Ulsan College of Medicine, Seoul, Republic of Korea*

**\*Corresponding author:**

Hyun Jung Chung, Ph.D.

Email: [hyunjc@kaist.ac.kr](mailto:hyunjc@kaist.ac.kr)

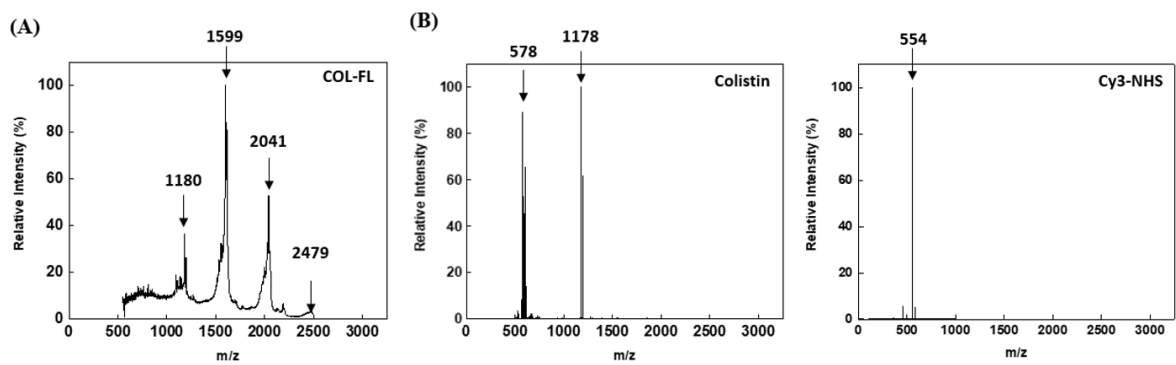

**Figure S1.** Characterization of COL-FL by mass spectrometry. (A) MALDI-MS of COL-FL. (B) MS/MS data of native colistin (left) and Cy3-NHS (right).

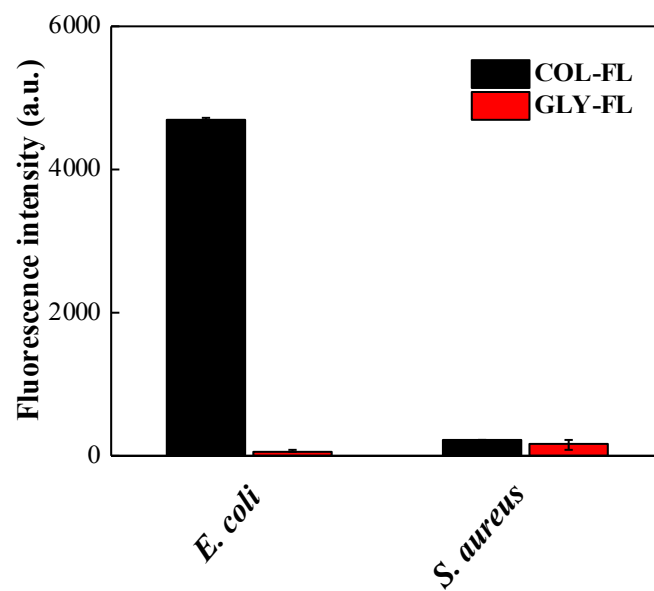

**Figure S2.** Assay results using COL-FL or the control conjugates (GLY-COL). Bacteria were added with the conjugates at a concentration of 1  $\mu$ M and incubated for 10 min.
